# Supplementary material for: Benchmarking time-series data discretization on inference methods
Source: Oxford University Press journal article supplement (doi:10.1093/bioinformatics/btz036), 2019-01-14
Supplement: bioinformatics_35_17_3102_s4.zip [file bioinformatics_35_17_3102_s4.zip]

The quick brown fox jumps over the lazy dog. The quick brown fox  
jumps over the lazy dog. The quick brown fox jumps over the lazy dog.  
The quick brown fox jumps over the lazy dog. The quick brown fox  
jumps over the lazy dog. The quick brown fox jumps over the lazy dog.  
The quick brown fox jumps over the lazy dog. The quick brown fox  
jumps over the lazy dog. The quick brown fox jumps over the lazy dog.  
The quick brown fox jumps over the lazy dog. The quick brown fox  
jumps over the lazy dog. The quick brown fox jumps over the lazy dog.

---

The quick brown fox jumps over the lazy dog. The quick brown fox  
jumps over the lazy dog. The quick brown fox jumps over the lazy dog.  
The quick brown fox jumps over the lazy dog. The quick brown fox  
jumps over the lazy dog. The quick brown fox jumps over the lazy dog.  
The quick brown fox jumps over the lazy dog. The quick brown fox  
jumps over the lazy dog. The quick brown fox jumps over the lazy dog.  
The quick brown fox jumps over the lazy dog. The quick brown fox  
jumps over the lazy dog. The quick brown fox jumps over the lazy dog.



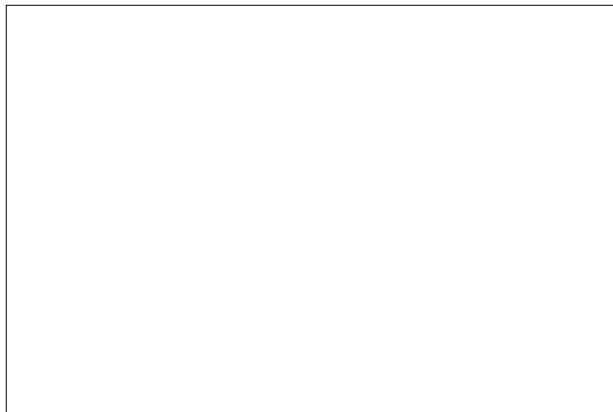

**Fig. 1. Relation between  $\tau$  and  $t$ .** This example has only two continuous Steppers,  $S_1$  and  $S_5$ .

[illegible]**Table 1.** Benchmark results of the cascade oscillators model

| S  | Predicted cost                | Timing | Predicted speed | Speed |
|----|-------------------------------|--------|-----------------|-------|
| 1  | \$219.20(100\%)\$             | 68m43s | 1.00            | 1.00  |
| 2  | $2^9.10+2^{19}.10(\sim 50\%)$ | 35m13s | 2.00            | 1.95  |
| 4  | $2^{19}.20(100\%)$            | 68m43s | 1.00            | 1.00  |
| 10 | $2^9.10+2^{19}.10(\sim 50\%)$ | 35m13s | 2.00            | 1.95  |
| 20 | $2^{19}.20(100\%)$            | 68m43s | 1.00            | 9.5   |

This is table foot note sample text This is table foot note sample text This is table foot note sample text

The quick brown fox jumps over the lazy dog. The quick brown fox  
jumps over the lazy dog. The quick brown fox jumps over the lazy dog.  
The quick brown fox jumps over the lazy dog. The quick brown fox  
jumps over the lazy dog. The quick brown fox jumps over the lazy dog.  
The quick brown fox jumps over the lazy dog. The quick brown fox  
jumps over the lazy dog.The quick brown fox jumps over the lazy dog.  
The quick brown fox jumps over the lazy dog. The quick brown fox  
jumps over the lazy dog. The quick brown fox jumps over the lazy dog.  
The quick brown fox jumps over the lazy dog. The quick brown fox  
jumps over the lazy dog.The quick brown fox jumps over the lazy dog.

## Acknowledgements

The quick brown fox jumps over the lazy dog. The quick brown fox jumps over the lazy dog. The quick brown fox jumps over the lazy dog. The quick brown fox jumps over the lazy dog. The quick brown fox jumps over the lazy dog. The quick brown fox jumps over the lazy dog.

## Funding

This work has been supported by the ....

*Conflict of Interest:* none declared.

## References

- Alexandrescu,A. (2001) *Modern C++ Design: Generic Programming and Design Patterns Applied*. Addison Wesley Professional, Boston.
- Dormand,J.R. and Prince,P.J. (1980) A family of embedded Runge–Kutta formulae. *J. Comp. Appl. Math.*, **6**, 19–26.
- Alexandrescu,A. (2001) *Modern C++ Design: Generic Programming and Design Patterns Applied*. Addison Wesley Professional, Boston.
- Dormand,J.R. and Prince,P.J. (1980) A family of embedded Runge–Kutta formulae. *J. Comp. Appl. Math.*, **6**, 19–26.
- Alexandrescu,A. (2001) *Modern C++ Design: Generic Programming and Design Patterns Applied*. Addison Wesley Professional, Boston.
- Dormand,J.R. and Prince,P.J. (1980) A family of embedded Runge–Kutta formulae. *J. Comp. Appl. Math.*, **6**, 19–26.
- Yoo,M.S. *et al.* (2003) Oxidative stress regulated genes in nigral dopaminergic neuron cell: correlation with the known pathology in Parkinson's disease. *Brain Res. Mol. Brain Res.*, **110**(Suppl. 1), 76–84.
- Crenshaw, B.,III, and Jones, W.B.,Jr (2003) The future of clinical cancer management: one tumor, one chip. *Bioinformatics*, doi:10.1093/bioinformatics/btn000.
- Auhtor,A.B. *et al.* (2000) Chapter title. In Smith, A.C. (ed.), *Book Title*, 2nd edn. Publisher, Location, Vol. 1, pp. ???–???
- Bardet, G. (1920) Sur un syndrome d'obesite infantile avec polydactylie et retinite pigmentaire (contribution a l'etude des formes cliniques de l'obesite hypophysaire). PhD Thesis, name of institution, Paris, France.
