# Supplementary material for: Benchmarking time-series data discretization on inference methods
Source: Oxford University Press journal article supplement (doi:10.1093/bioinformatics/btz036), 2019-01-14
Supplement: bioinformatics_35_17_3102_s4.zip [file bioinformatics_35_17_3102_s4.zip]

OXFORD
